# Supplementary material for: Including RNA secondary structures improves accuracy and robustness in reconstruction of phylogenetic trees
Source: Springer Nature journal article supplement (doi:10.1186/1745-6150-5-4), 2010-01-15
Supplement: Additional file 3 [file 1745-6150-5-4-s3.pdf]

**Additional file 3 Table 1 - ITS2 species nucleotide relative rate matrix  $Q_{seq}$**

|   | A     | C     | G     | U     |
|---|-------|-------|-------|-------|
| A | 0.000 | 0.945 | 2.297 | 1.117 |
| C | 0.945 | 0.000 | 1.040 | 2.973 |
| G | 2.297 | 1.040 | 0.000 | 1.000 |
| U | 1.117 | 2.973 | 1.000 | 0.000 |

**Additional file 3 Table 2 - ITS2 species dinucleotide relative rate matrix  $Q_{struct}$**

|    | AA    | AC    | AG    | AU    | CA    | CC    | CG    | CU    | GA    | GC    | GG    | GU    | UA    | UC    | UG    | UU    |
|----|-------|-------|-------|-------|-------|-------|-------|-------|-------|-------|-------|-------|-------|-------|-------|-------|
| AA | 0.000 | 0.000 | 0.000 | 0.000 | 0.039 | 0.000 | 0.000 | 0.000 | 0.522 | 0.000 | 0.000 | 0.000 | 1.056 | 0.000 | 0.000 | 0.000 |
| AC | 0.000 | 0.000 | 0.000 | 0.000 | 0.000 | 0.063 | 0.000 | 0.000 | 0.000 | 1.919 | 0.000 | 0.000 | 0.000 | 0.338 | 0.000 | 0.000 |
| AG | 0.000 | 0.000 | 0.000 | 0.000 | 0.000 | 0.000 | 1.023 | 0.000 | 0.000 | 0.000 | 0.327 | 0.000 | 0.000 | 0.000 | 1.839 | 0.000 |
| AU | 0.000 | 0.000 | 0.000 | 0.000 | 0.000 | 0.000 | 0.000 | 0.934 | 0.000 | 0.000 | 0.000 | 0.090 | 0.000 | 0.000 | 0.000 | 1.049 |
| CA | 0.039 | 0.000 | 0.000 | 0.000 | 0.000 | 0.000 | 0.000 | 0.000 | 0.005 | 0.000 | 0.000 | 0.000 | 1.082 | 0.000 | 0.000 | 0.000 |
| CC | 0.000 | 0.063 | 0.000 | 0.000 | 0.000 | 0.000 | 0.000 | 0.000 | 0.000 | 1.611 | 0.000 | 0.000 | 0.000 | 0.248 | 0.000 | 0.000 |
| CG | 0.000 | 0.000 | 1.023 | 0.000 | 0.000 | 0.000 | 0.000 | 0.000 | 0.000 | 0.000 | 1.042 | 0.000 | 0.000 | 0.000 | 0.155 | 0.000 |
| CU | 0.000 | 0.000 | 0.000 | 0.934 | 0.000 | 0.000 | 0.000 | 0.000 | 0.000 | 0.000 | 0.000 | 0.934 | 0.000 | 0.000 | 0.000 | 0.111 |
| GA | 0.522 | 0.000 | 0.000 | 0.000 | 0.005 | 0.000 | 0.000 | 0.000 | 0.000 | 0.000 | 0.000 | 0.000 | 1.061 | 0.000 | 0.000 | 0.000 |
| GC | 0.000 | 1.919 | 0.000 | 0.000 | 0.000 | 1.611 | 0.000 | 0.000 | 0.000 | 0.000 | 0.000 | 0.000 | 0.000 | 1.910 | 0.000 | 0.000 |
| GG | 0.000 | 0.000 | 0.327 | 0.000 | 0.000 | 0.000 | 1.042 | 0.000 | 0.000 | 0.000 | 0.000 | 0.000 | 0.000 | 0.000 | 1.735 | 0.000 |
| GU | 0.000 | 0.000 | 0.000 | 0.090 | 0.000 | 0.000 | 0.000 | 0.934 | 0.000 | 0.000 | 0.000 | 0.000 | 0.000 | 0.000 | 0.000 | 1.000 |
| UA | 1.056 | 0.000 | 0.000 | 0.000 | 1.082 | 0.000 | 0.000 | 0.000 | 1.061 | 0.000 | 0.000 | 0.000 | 0.000 | 0.000 | 0.000 | 0.000 |
| UC | 0.000 | 0.338 | 0.000 | 0.000 | 0.000 | 0.248 | 0.000 | 0.000 | 0.000 | 1.910 | 0.000 | 0.000 | 0.000 | 0.000 | 0.000 | 0.000 |
| UG | 0.000 | 0.000 | 1.839 | 0.000 | 0.000 | 0.000 | 0.155 | 0.000 | 0.000 | 0.000 | 1.735 | 0.000 | 0.000 | 0.000 | 0.000 | 0.000 |
| UU | 0.000 | 0.000 | 0.000 | 1.049 | 0.000 | 0.000 | 0.000 | 0.111 | 0.000 | 0.000 | 0.000 | 1.000 | 0.000 | 0.000 | 0.000 | 0.000 |
